# Supplementary material
Source: PubMed Central journal article supplement (PMC3101277)
Supplement: NIHMS289749-supplement-1_si_001.pdf [file NIHMS289749-supplement-1_si_001.pdf]

Supplemental Section for

**Short-chain PEG Mixed-Monolayer Protected Gold Clusters Increase Clearance and Red Blood Cell Counts**

Carrie A. Simpson, Amanda C. Rape, Andrzej Balinski, Kellen Harkness, and David E. Cliffl

*Department of Chemistry, Vanderbilt University, Nashville, TN 37235*

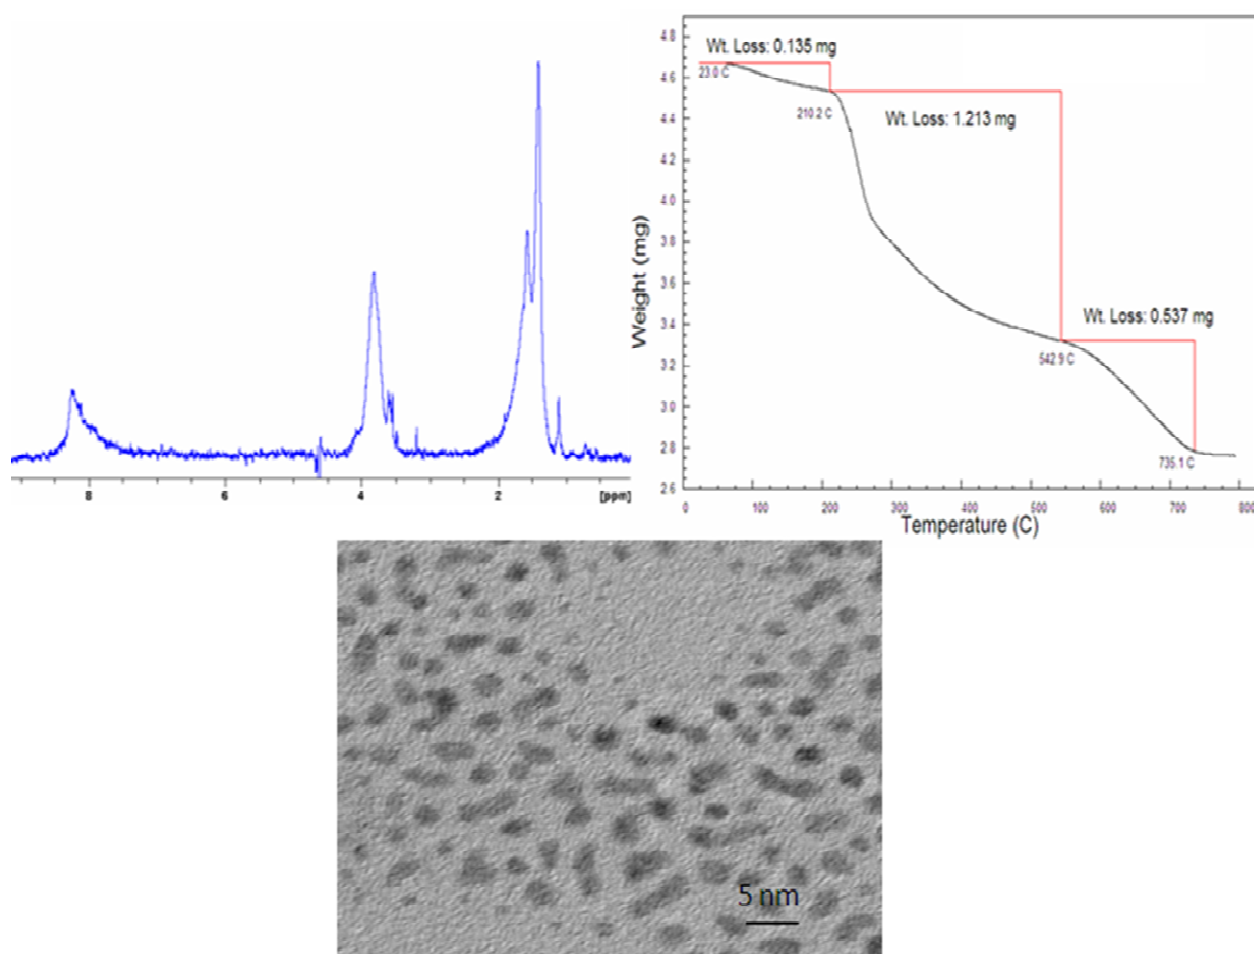

Figure S1. Original TMPC characterization data for PEG<sub>4</sub>-acid. <sup>1</sup>H NMR shows characteristic line-broadening for TMPCs while TGA shows organic loss of 38% (first step is due to water loss and is subtracted from overall mass); TEM measurements showed an average particle size of 2.5 ± 0.6 nm.

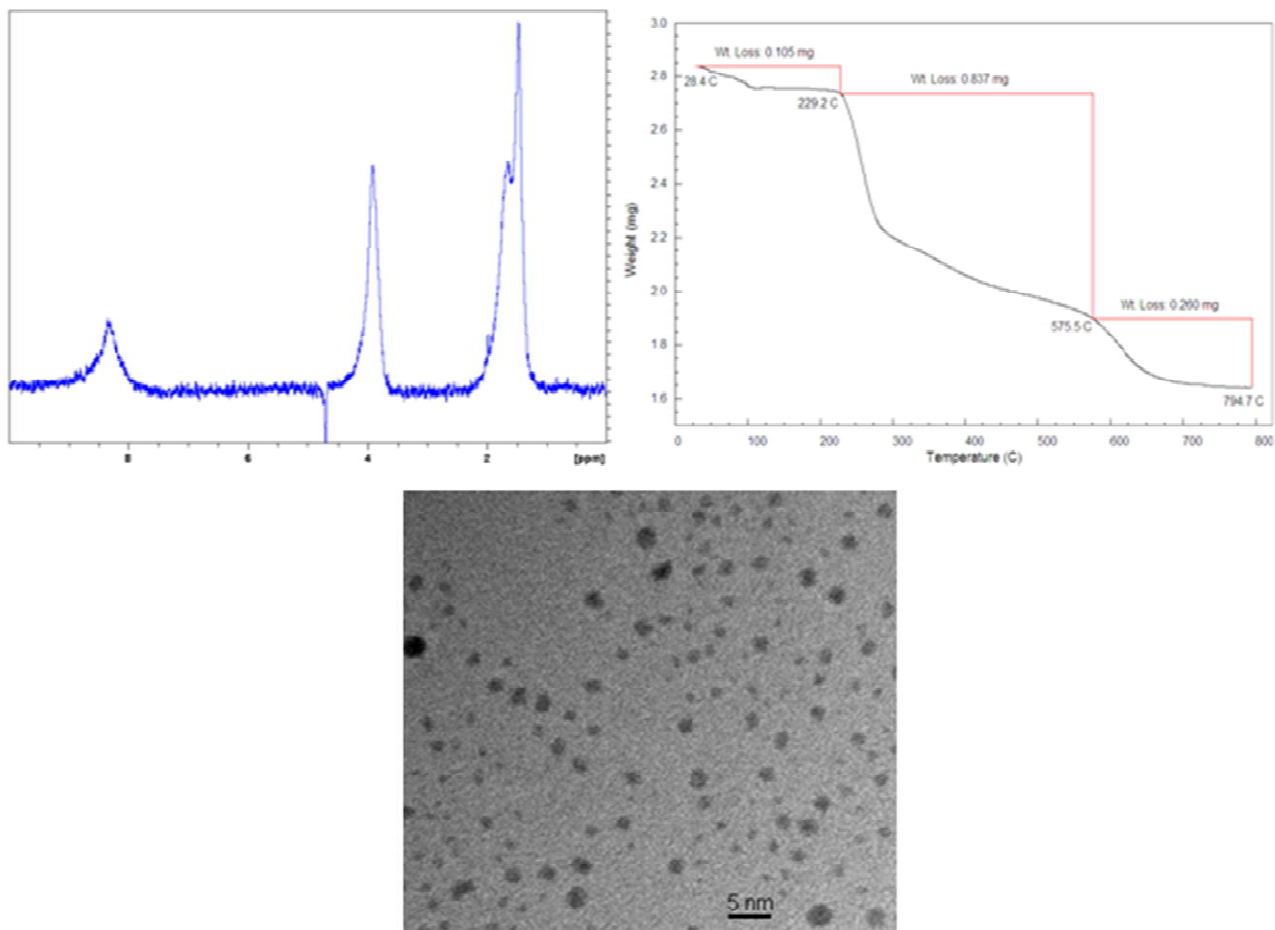

Figure S2. Original TMPC characterization data for PEG<sub>4</sub>-OH.  $^1\text{H}$  NMR shows characteristic line-broadening for TMPCs while TGA shows organic loss of 31% (first step is due to water loss and is subtracted from overall mass); TEM measurements showed an average particle size of  $2.1 \pm 0.5$  nm.

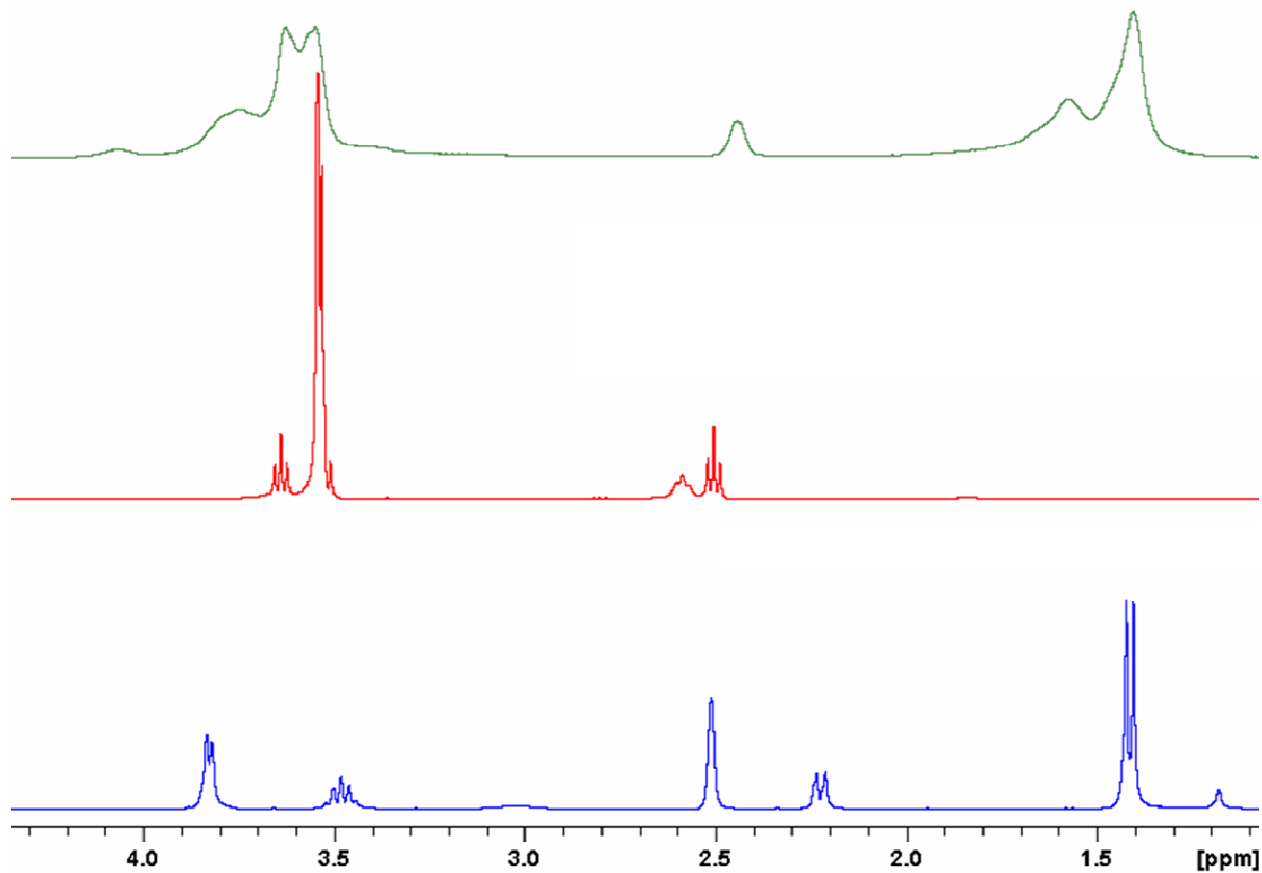

Figure S3.  $^1\text{H}$  NMR spectra for tiopronin ligand (blue), PEG<sub>4</sub>-acid ligand (red), and 15:1 exchange reaction (green). The peak at 1.4 ppm is isolated to the tiopronin ligand while the peak at 2.5 ppm is isolated to the PEG<sub>4</sub>-acid ligand; these peaks were used for quantification in these studies as shown in the 15:1 exchange spectrum. The peak at 2.5 ppm in the tiopronin spectrum is due to the sulfur hydrogen, which is eliminated upon attachment to the gold core.

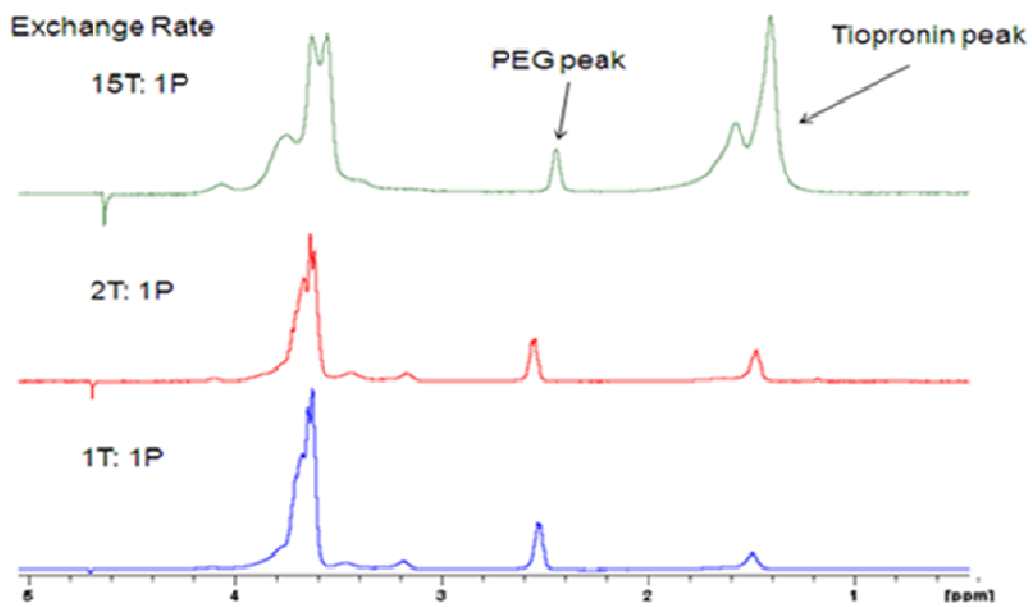

| T:P exchange ratio (mol:mol) | NMR integration (T:P) | Molecular Formula by NMR                         | Percentage PEG by NMR |
|------------------------------|-----------------------|--------------------------------------------------|-----------------------|
| 15:1                         | 26:3                  | $\text{Au}_{485}\text{TiO}_{163}\text{PEG}_{19}$ | ~10%                  |
| 2:1                          | 2:3                   | $\text{Au}_{485}\text{TiO}_{73}\text{PEG}_{109}$ | ~60%                  |
| 1:1                          | 1:3                   | $\text{Au}_{485}\text{TiO}_{45}\text{PEG}_{137}$ | ~75%                  |

Figure S4.  $^1\text{H}$  NMR spectra for 15:1, 2:1, and 1:1 tiopronin: PEG<sub>4</sub>-acid (mol:mol) place-exchange reactions and the resulting integration values, percentage PEG-ylation of the nanocluster, and improved molecular formula.

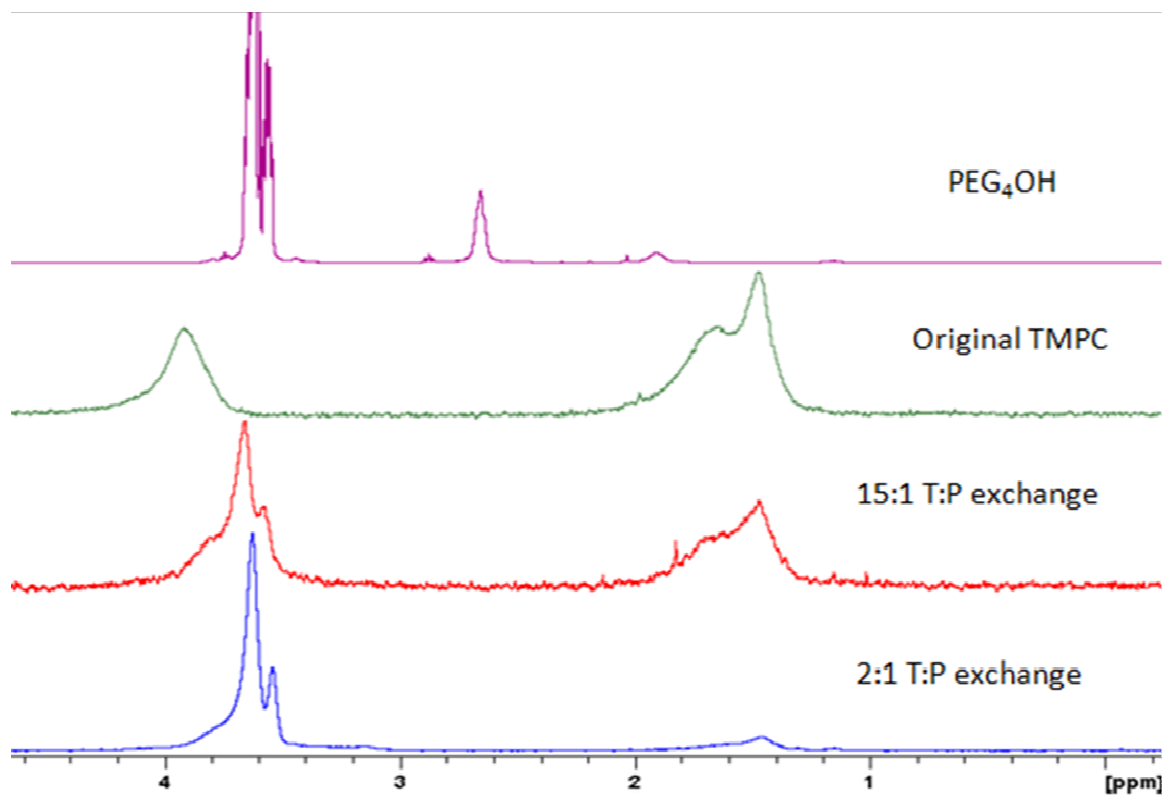

| T:P exchange ratio (mol:mol) | NMR integration (T:P) | Molecular Formula by NMR                                | Percentage PEG by NMR |
|------------------------------|-----------------------|---------------------------------------------------------|-----------------------|
| <b>15:1</b>                  | <b>15:2</b>           | <b>Au<sub>287</sub>TiO<sub>74</sub>PEG<sub>10</sub></b> | <b>~11%</b>           |
| <b>2:1</b>                   | <b>2:3</b>            | <b>Au<sub>287</sub>TiO<sub>34</sub>PEG<sub>50</sub></b> | <b>~60%</b>           |

Figure S5. . <sup>1</sup>H NMR spectra for PEG<sub>4</sub>-OH ligand (purple), original TMPC (green), 15:1 exchange reaction (red) and 2:1 exchange reaction (blue). The peak at 2.5 ppm in the PEG<sub>4</sub>-OH spectrum is due to the sulfur hydrogen, which is eliminated upon attachment to the gold core. Also shown are the resulting integration values, percentage PEG-ylation of the nanocluster, and improved molecular formula.

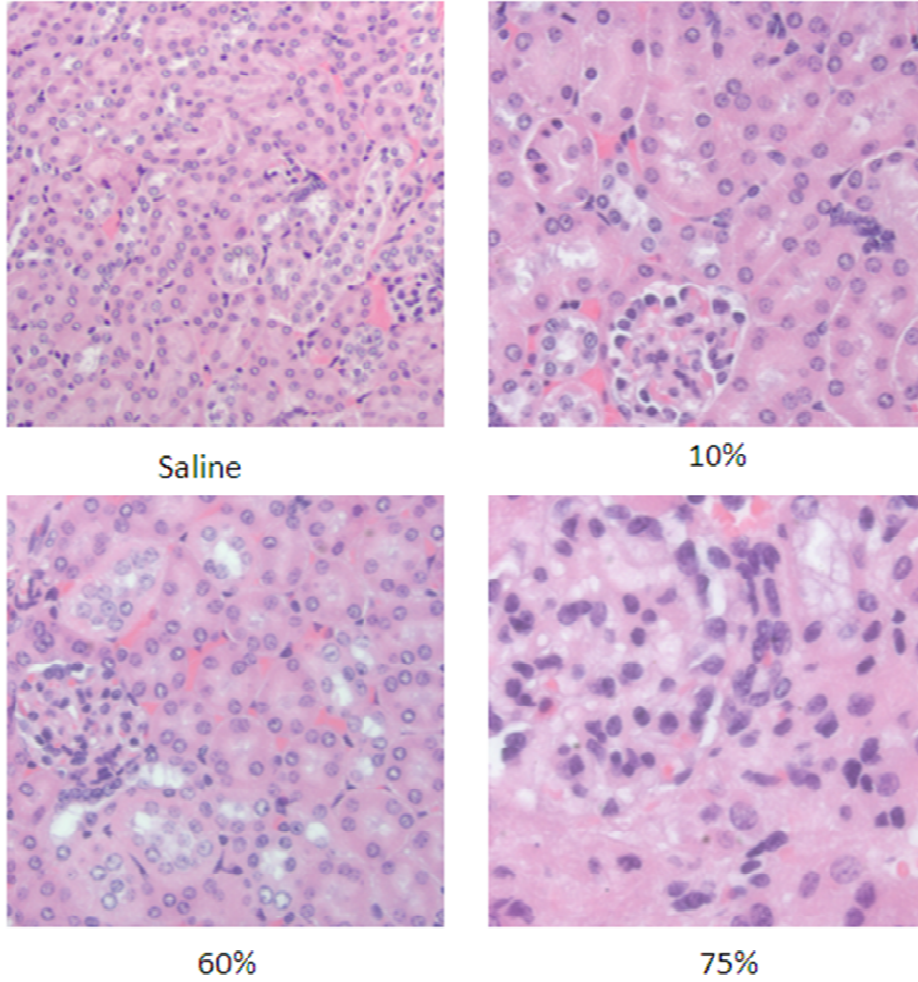

**Figure S6. Renal histological analysis for representative saline subject and all PEG<sub>4</sub>-acid place-exchange subjects. Mild increase in cellularity of glomerular tufts was noted for both control and injected subjects and was deemed minimal and attributable to a background lesion after subsequent PAS staining.**

| PEG <sub>4</sub> -acid Average WBC counts<br>(cells x 10 <sup>3</sup> /mL) |             |             |             |
|----------------------------------------------------------------------------|-------------|-------------|-------------|
| Formulation                                                                | 0 weeks     | 2 weeks     | 4 weeks     |
| Saline                                                                     | 1.49 ± 0.51 | 1.34 ± 0.59 | 1.63 ± 0.13 |
| 10% PEG                                                                    | 1.63 ± 0.23 | 1.57 ± 0.38 | 1.20 ± 0.45 |
| 60% PEG                                                                    | 1.38 ± 0.28 | 1.30 ± 0.69 | 0.99 ± 0.09 |
| 75% PEG                                                                    | 1.84 ± 0.08 | 1.59 ± 0.93 | 1.21 ± 0.49 |

| PEG <sub>4</sub> -OH Average WBC counts<br>(cells x 10 <sup>3</sup> /mL) |             |             |             |
|--------------------------------------------------------------------------|-------------|-------------|-------------|
| Formulation                                                              | 0 weeks     | 2 weeks     | 4 weeks     |
| 11% PEG                                                                  | 1.14 ± 0.30 | 1.20 ± 0.89 | 1.89 ± 0.84 |
| 60% PEG                                                                  | 1.43 ± 0.85 | 2.13 ± 0.55 | 2.36 ± 0.96 |

| PEG <sub>4</sub> -acid Average RBC counts<br>(cells x 10 <sup>5</sup> /mL) |             |             |                    |
|----------------------------------------------------------------------------|-------------|-------------|--------------------|
| Formulation                                                                | 0 weeks     | 2 weeks     | 4 weeks            |
| Saline                                                                     | 2.00 ± 0.77 | 1.43 ± 0.49 | 2.07 ± 0.15        |
| 10% PEG                                                                    | 2.04 ± 0.27 | 1.73 ± 0.12 | 1.56 ± 0.57        |
| 60% PEG                                                                    | 2.00 ± 0.35 | 1.66 ± 0.58 | <b>2.98 ± 0.15</b> |
| 75% PEG                                                                    | 2.17 ± 0.25 | 1.66 ± 0.84 | <b>2.78 ± 0.59</b> |

| PEG <sub>4</sub> -OH Average RBC counts<br>(cells x 10 <sup>5</sup> /mL) |             |             |                    |
|--------------------------------------------------------------------------|-------------|-------------|--------------------|
| Formulation                                                              | 0 weeks     | 2 weeks     | 4 weeks            |
| 11% PEG                                                                  | 1.90 ± 0.07 | 2.84 ± 1.49 | 2.39 ± 0.80        |
| 60% PEG                                                                  | 1.43 ± 0.56 | 3.18 ± 0.65 | <b>2.61 ± 1.17</b> |

Figure S7. Individual WBC and RBC count at 0, 2, and 4 weeks for both short-chain PEGs investigated. A significant increase in individual RBC counts was noted for the PEG-acid chain at 4 weeks for both 60% and 75% coverage, independent of WBC count, and is shown in bold.
